# Supplementary material for: Complete genome sequence and comparative genome analysis of Klebsiella oxytoca HKOPL1 isolated from giant panda feces
Source: PubMed Central journal article supplement (PMC4289185; doi:10.1186/1756-0500-7-827), 2014-11-23

# Prophage region

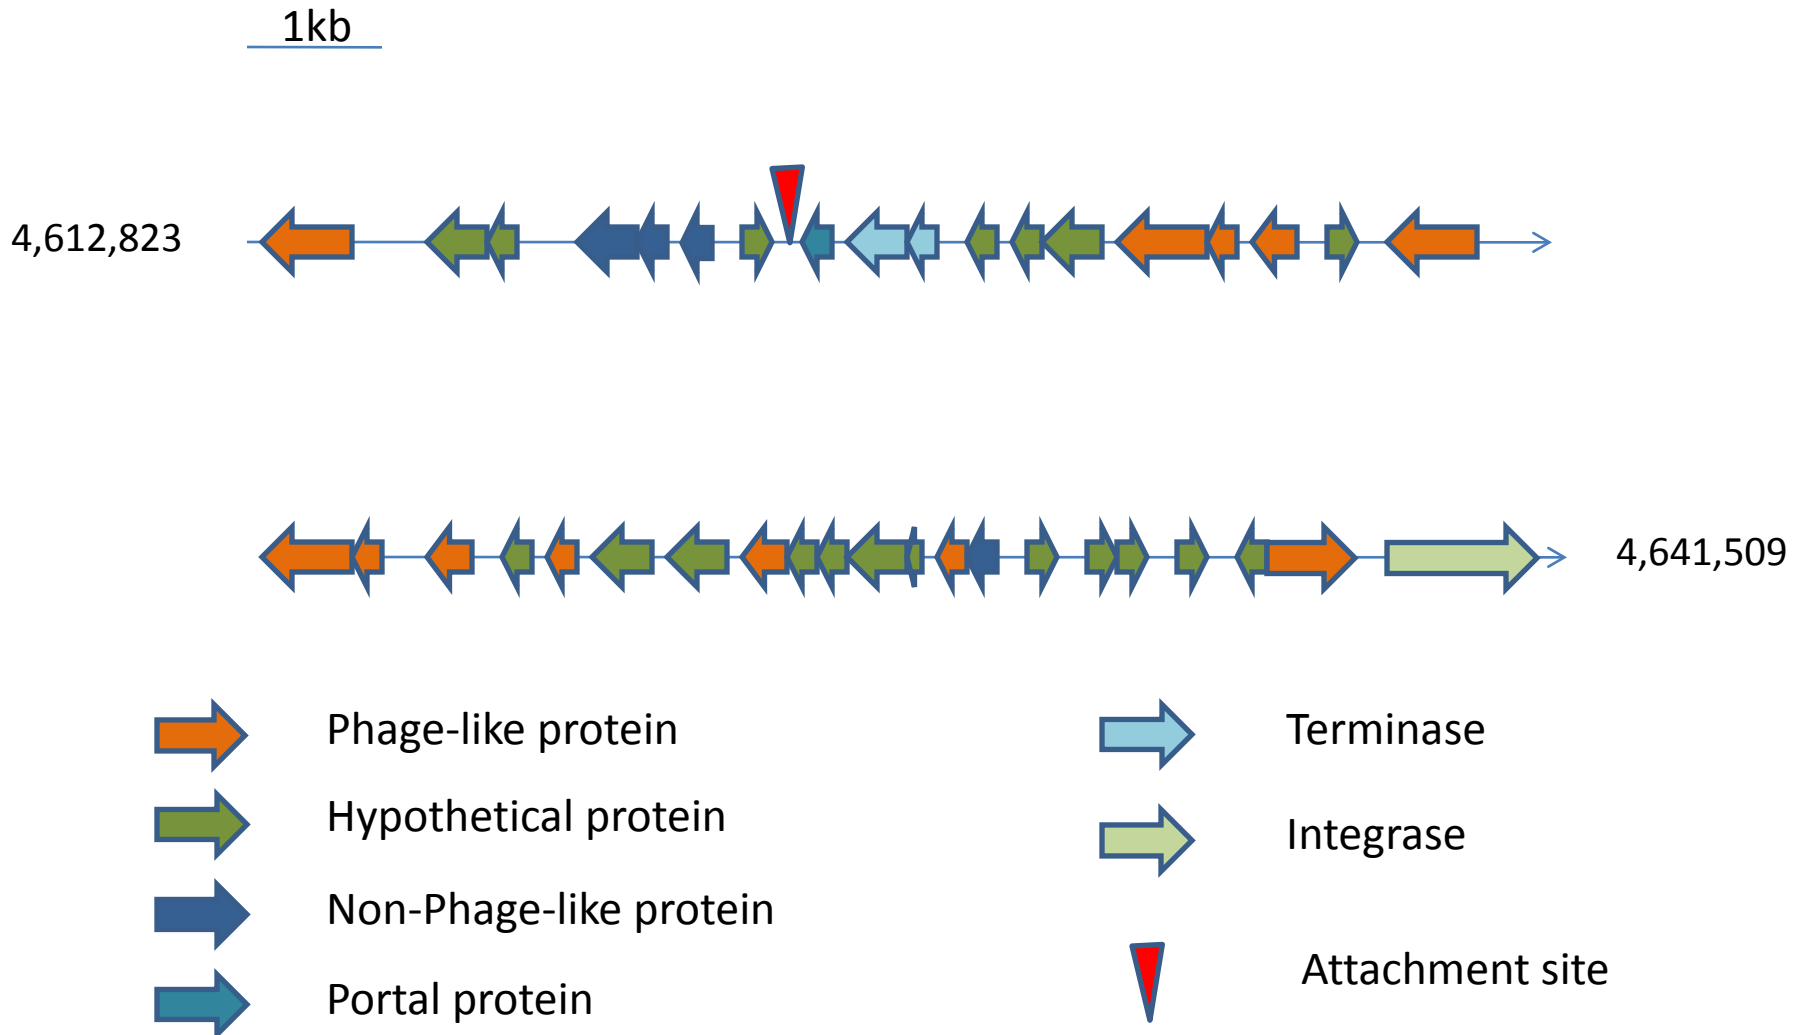

Supplement: 13104_2014_3426_MOESM6_ESM.pdf [file 13104_2014_3426_MOESM6_ESM.pdf]
